# Supplementary material for: Operando FT-IR spectroscopy as a useful tool for elucidating the fate of phthalimide-N-oxyl catalytically active species
Source: Royal Society of Chemistry journal article supplement (doi:10.1039/d4nj03476g), 2024-01-01
Supplement: d4nj03476g1.pdf [file d4nj03476g1.pdf]

***Supporting Information***

***Operando FT-IR spectroscopy as a useful tool for elucidating the fate of  
phthalimide-N-oxyl catalytically active species***

**Irina R. Subbotina<sup>1\*</sup>, Elena R. Lopat'eva<sup>1</sup>, Igor B. Krylov<sup>1\*</sup> and Alexander O. Terent'ev<sup>1</sup>**

<sup>1</sup> N. D. Zelinsky Institute of Organic Chemistry, Russian Academy of Sciences, 47 Leninsky Prospekt,  
Moscow 119991, Russia.

E-mail: subbot@ioc.ac.ru, krylovigor@yandex.ru

## Table of Contents

|    |                                                                                                 |     |
|----|-------------------------------------------------------------------------------------------------|-----|
| 1. | FTIR spectra of NHPI in acetonitrile solution.....                                              | S3  |
| 2. | FTIR spectra of individual substances in the region of C=O band.....                            | S4  |
| 3. | FTIR spectra of individual substances in the 1100–1350 cm <sup>-1</sup> region. ....            | S5  |
| 4. | The photographs of the reaction mixture.....                                                    | S7  |
| 5. | DFT calculations.....                                                                           | S8  |
| 6. | The summary: assignment of the absorption bands in the region 1100–1350 cm <sup>-1</sup><br>S27 |     |
|    | References.....                                                                                 | S28 |

## 1. FTIR spectra of NHPI in acetonitrile solution

Figure S1 shows the IR spectrum of the NHPI solution in acetonitrile in the range of 700–2500  $\text{cm}^{-1}$ . The assignment of the observed absorption bands based on the literature data<sup>1,2</sup> is presented in Table S1.

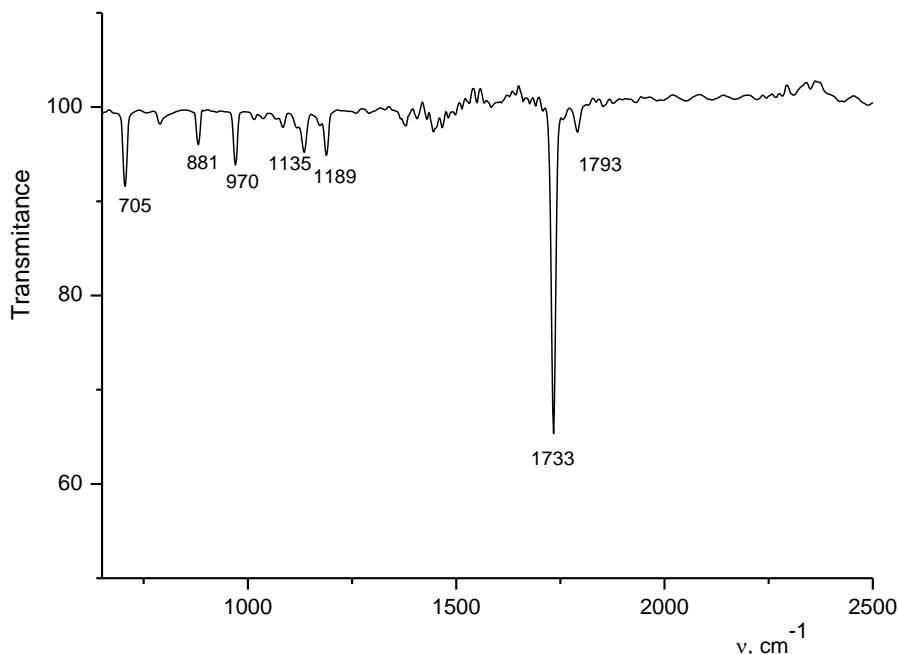

Fig. S1. IR spectra of NHPI in acetonitrile solution

As can be seen from the Fig. S1, the most intense absorption band in the area in question is 1733  $\text{cm}^{-1}$ . This absorption band along with less intense peak at 1791  $\text{cm}^{-1}$  is assigned to asymmetric and symmetric C=O stretching vibration in the NHPI carbonyl group, respectively.<sup>3</sup> Typically, C=O vibrations exhibit strong intensities in IR spectra due to their significant dipole moments and are easily detectable. Additionally, minor noise observed in the spectrum around 1600 and 3700  $\text{cm}^{-1}$  may be linked to residual water traces in the solvent.

**Table S1. The assignment of the absorption bands of N-hydroxyphthalimide.**

| $\nu$ , $\text{cm}^{-1}$ | Assignment                            |
|--------------------------|---------------------------------------|
| 1793                     | $\nu$ (C=O) symmetric                 |
| 1733                     | $\nu$ (C=O) asymmetric                |
| 1189                     | $\delta$ (C–H) , $\nu$ (C–C)          |
| 1135                     | $\delta$ -ring (in cyclic imide ring) |
| 970                      | def(C–H)                              |
| 881                      | Ring breathing $\delta$ (N–OH)        |
| 705                      | $\delta$ (O–H) out of plane bending   |

## 2. FTIR spectra of individual substances in the region of C=O band.

In Fig. S2, IR spectra of individual substances are presented: NHPI, PIDA, synthesized «trimer», phthalic anhydride, phthalic acid, and acetic acid in the region of C=O vibrations, 1600–1800  $\text{cm}^{-1}$ . Iodobenzene have no signals in this region. The frequencies of the most intense band of C=O vibrations in the «trimer» and in PIDA are 1749  $\text{cm}^{-1}$  and 1650  $\text{cm}^{-1}$ , respectively.

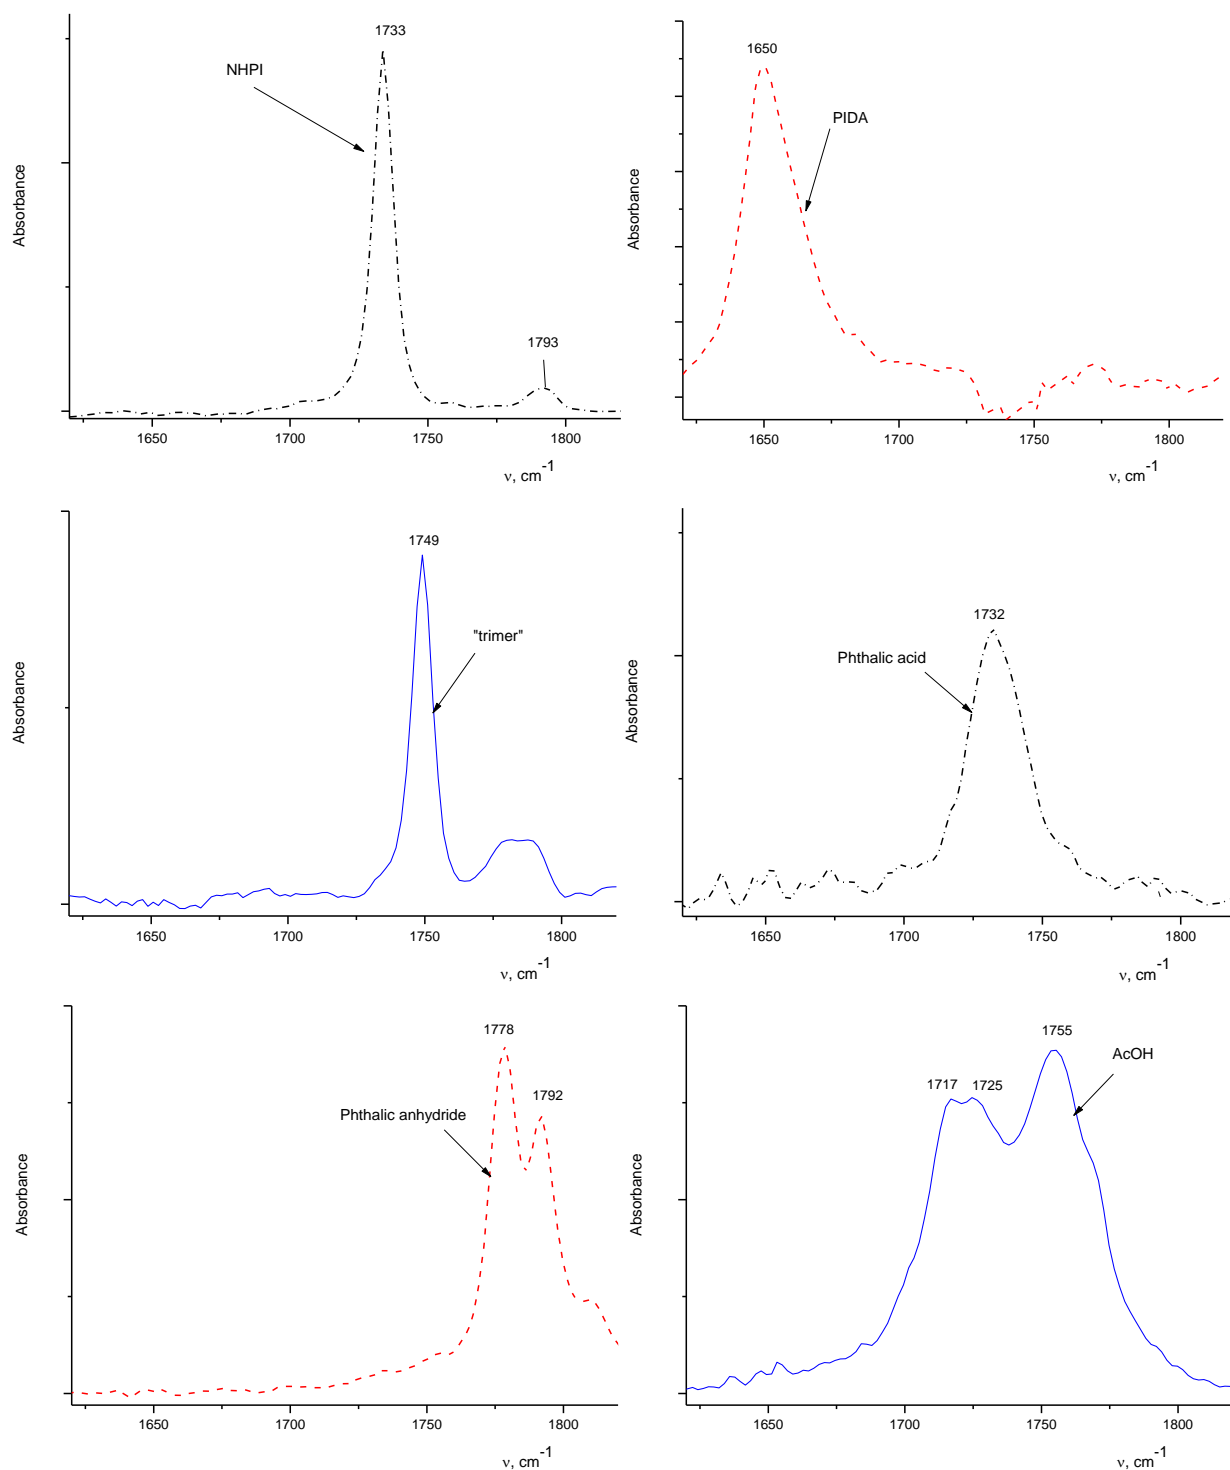

Fig. S2. IR spectra of NHPI, PIDA, «trimer», phthalic anhydride, phthalic acid and AcOH in the region of C=O band.

### 3. FTIR spectra of individual substances in the 1100–1350 $\text{cm}^{-1}$ region.

In Fig. S3, IR spectra of individual substances in the range of 1100–1350  $\text{cm}^{-1}$  are shown, characteristic of the C–O bond in  $-(\text{C}=\text{O})-\text{O}-$  groups. Iodobenzene have no signals in this region.

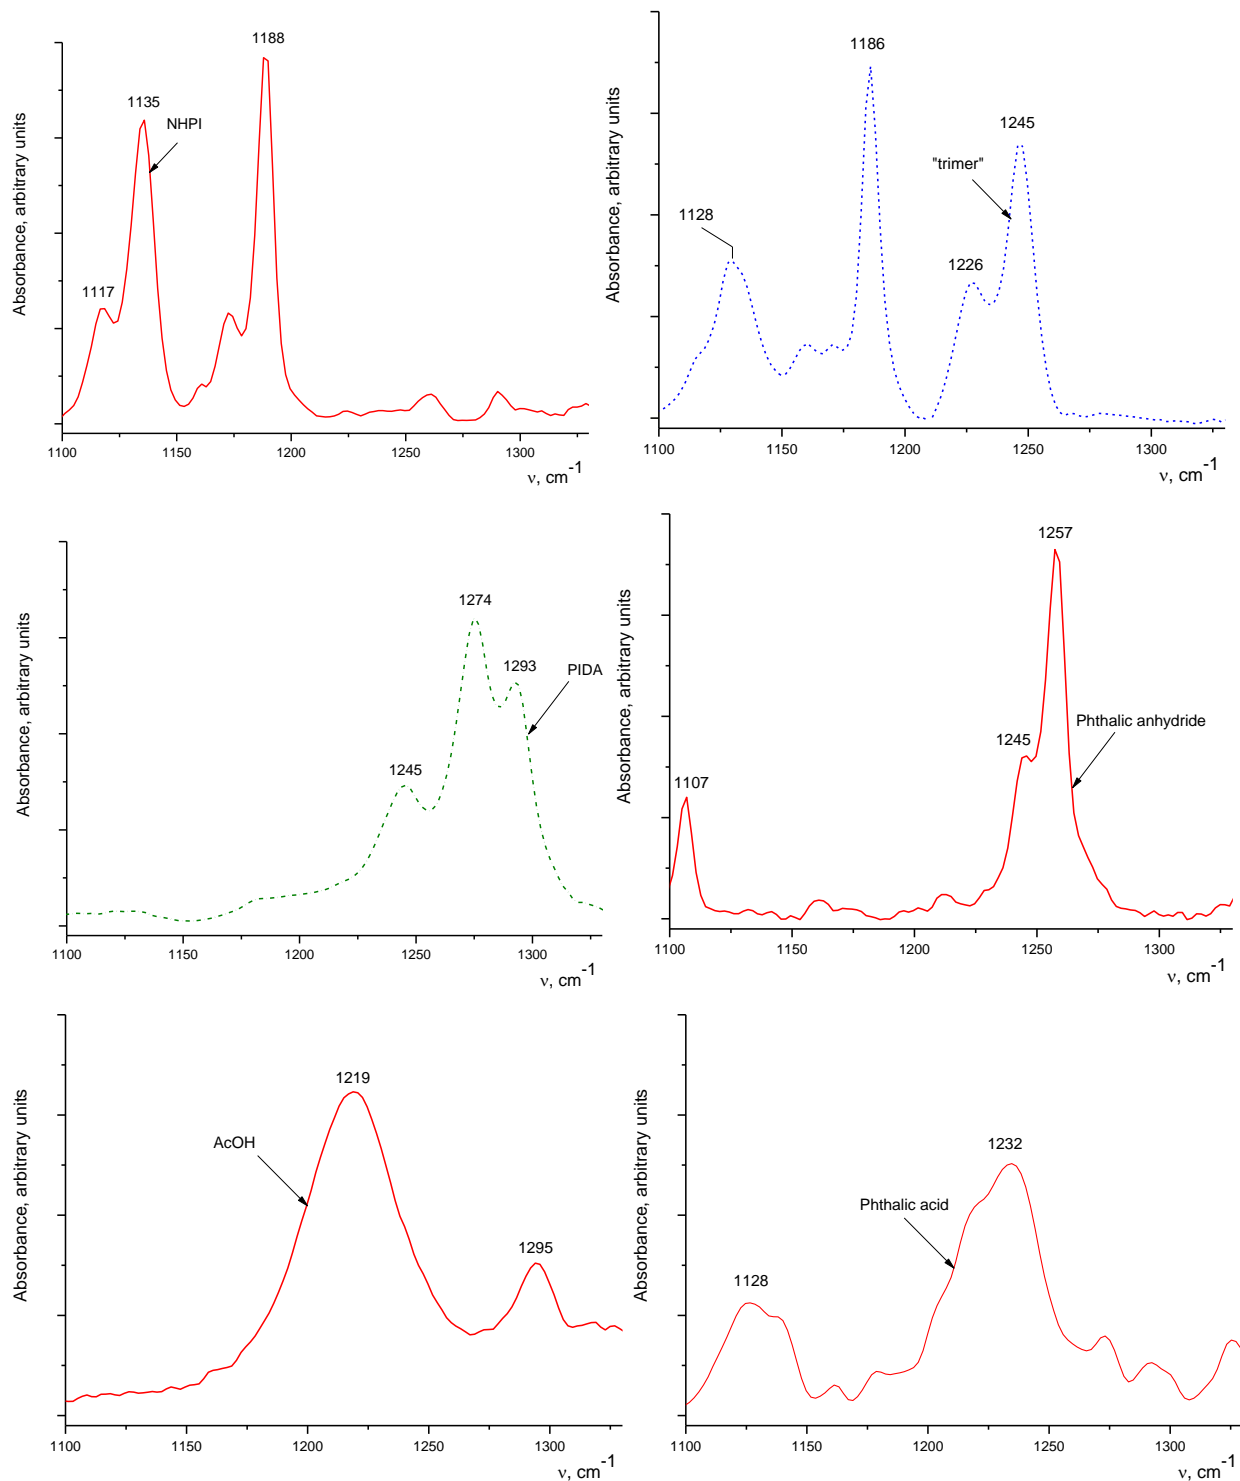

Fig. S3. IR spectra of NHPI, PIDA, "trimer", phthalic anhydride, phthalic acid and AcOH in the region of 1100–1350  $\text{cm}^{-1}$ .

For the NHPI in this range two absorption bands are observed with maxima at 1135 and 1188  $\text{cm}^{-1}$ . For the “trimer”, two bands of close frequency with maxima at 1128 and 1186  $\text{cm}^{-1}$  are also observed, as well as two bands in the region above 1200  $\text{cm}^{-1}$  – 1226 and 1245  $\text{cm}^{-1}$ . The latter two bands are apparently associated with C–O vibrations in the O–(C=O) group in the “trimer”. For the PIDA the absorption bands at 1245, 1275 and 1293  $\text{cm}^{-1}$  appear higher in frequency than for NHPI and the “trimer”, and, apparently, correspond to the bending vibration of the benzene ring and symmetric and antisymmetric C–O stretching vibrations in the carboxyl group.

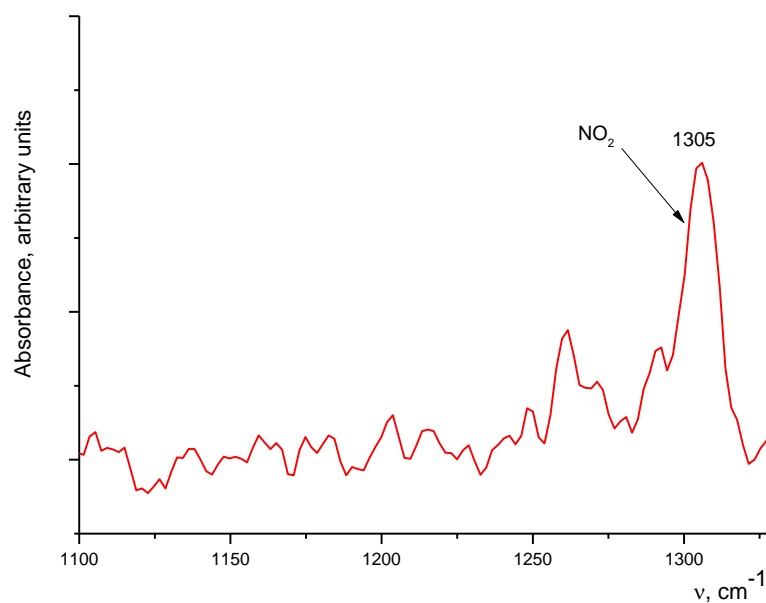

Fig. S4. IR spectrum of NO<sub>2</sub> in the region of 1100–1350  $\text{cm}^{-1}$ .

#### 4. The photographs of the reaction mixture

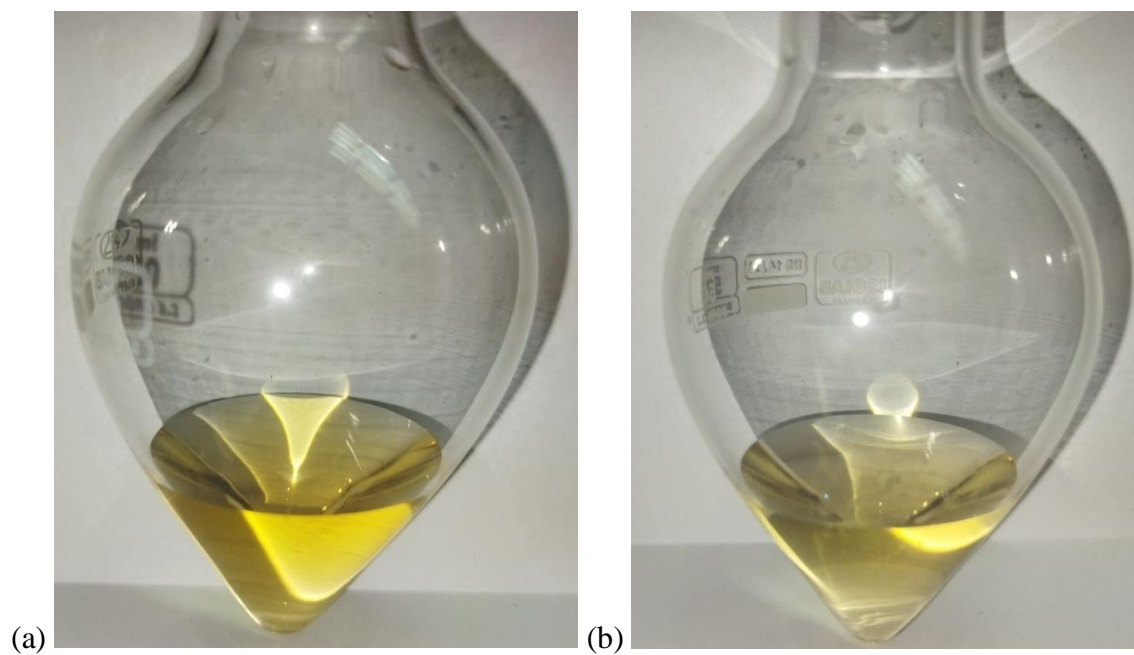

Fig. S5. Photographs of the reaction mixture (a) immediately after PINO decomposition (detected by EPR) and (b) day after PINO decomposition

## 5. DFT calculations

DFT calculations were performed in order to assign observed IR bands to PINO and NHPI vibration modes.

DFT calculations were performed in Gaussian 16 program package,<sup>4</sup> results were visualized by GaussView6 program. B3LYP functional modified with D3 version of Grimme's dispersion with Becke-Johnson damping (keyword "EmpiricalDispersion=GD3BJ")<sup>5</sup> and 6-311++g(d,p) basis set were used for geometry optimizations and anharmonic vibrational analysis (keyword "freq=anharmonic"). No scaling factor were applied and default Gaussian 16 settings were used unless otherwise noted. CPCM model (keyword "scrf=(cpcm,solvent=acetonitrile)")<sup>6,7</sup> was used for modeling of MeCN solvent medium. Calculations were performed for temperature 298.150 K and 1 atm. pressure.

In order to check the performance of the chosen method, we first calculated unharmonic frequencies for the diacetyliminoxyl, an N-oxyl radical, for which experimental FT-IR data was reported previously. The problem of assignment of IR spectral lines for PINO radical arises from the fact that due to its limited stability, PINO cannot be isolated from oxidant and other components of the reaction mixture, in which PINO was generated. In contrast to PINO, diacetyliminoxyl was previously isolated from oxidant and IR spectrum of individual diacetyliminoxyl in CH<sub>2</sub>Cl<sub>2</sub> is available.<sup>8</sup> The computational procedure described above (except for changing "scrf=(cpcm,solvent=acetonitrile)" to "scrf=(cpcm,solvent=dichloromethane)") was applied to the prediction of anharmonic frequencies of diacetyliminoxyl (Table S2) and the corresponding parent NOH compound (Table S3). In summary, anharmonic frequency analysis provides significantly improved accuracy over unscaled harmonic frequency calculations, whereas scaling harmonic frequencies by a factor of 0.9679 (recommended for B3LYP functional for basis sets from 6-311G(d,p) to 6-311++G(3df,3pd)<sup>9</sup>) for the majority of bands in middle IR region gives frequency values very close to those predicted by anharmonic frequency analysis.



**Table S2. Assignment of the most intensive IR bands in the FT-IR spectrum of diacetyliminoxyl radical in CH<sub>2</sub>Cl<sub>2</sub>,<sup>8</sup> which do not overlap with CH<sub>2</sub>Cl<sub>2</sub> solvent bands.<sup>a</sup>**

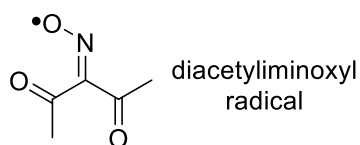

| Experimental <sup>8</sup><br>IR freq., cm <sup>-1</sup> | Predicted<br>harmonic IR<br>freq., cm <sup>-1</sup> ,<br><b>scaled by<br/>factor<br/>0.9679<sup>9</sup></b> | Predicted<br>anharmonic<br>IR freq., cm <sup>-1</sup><br>(predicted<br>intensity,<br>km/mol) | Displacement vectors/Assignment                                                                                  |
|---------------------------------------------------------|-------------------------------------------------------------------------------------------------------------|----------------------------------------------------------------------------------------------|------------------------------------------------------------------------------------------------------------------|
| 1556<br>vs                                              | 1592<br><b>1541</b>                                                                                         | 1543<br>(494)                                                                                | 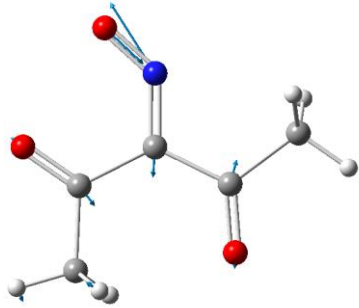<br>v <sub>as</sub> (C=N-O•) |
| 1699<br>s                                               | 1725<br><b>1670</b>                                                                                         | 1695<br>(256)                                                                                | <br>v(C=O)                  |
| 1166<br>m                                               | 1188<br><b>1150</b>                                                                                         | 1152<br>(73)                                                                                 |                             |
| 1685<br>sh                                              | 534, 1188                                                                                                   | 1671<br>(58)                                                                                 | Combined band                                                                                                    |

|           |                     |              |  |
|-----------|---------------------|--------------|--|
|           |                     |              |  |
| 1362<br>m | 1384<br><b>1339</b> | 1340<br>(58) |  |
| 613       | 621<br><b>601</b>   | 614<br>(52)  |  |

<sup>a</sup> Lines are sorted according to predicted band intensity (given in parenthesis in column 3). Used abbreviations: vs – very strong, s – strong, sh – shoulder, m – medium, v - stretching

**Table S3. Assignment of the most intensive IR bands in the FT-IR spectrum of diacetyl oxime in CH<sub>2</sub>Cl<sub>2</sub>,<sup>8</sup> which do not overlap with CH<sub>2</sub>Cl<sub>2</sub> solvent bands.<sup>a</sup>**

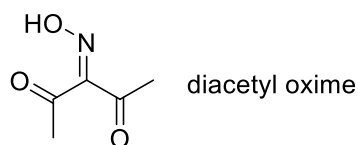

| Experimental <sup>8</sup><br>IR freq., cm <sup>-1</sup> | Predicted<br>harmonic IR<br>freq., cm <sup>-1</sup><br>(scaled by<br>factor<br>0.9679) <sup>9</sup> | Predicted<br>anharmonic<br>IR freq., cm <sup>-1</sup><br>(predicted<br>intensity,<br>km/mol) | Displacement vectors/Assignment                                                                 |
|---------------------------------------------------------|-----------------------------------------------------------------------------------------------------|----------------------------------------------------------------------------------------------|-------------------------------------------------------------------------------------------------|
| 1724<br>vs                                              | 1771<br><b>1714</b>                                                                                 | 1737.5<br>(204)                                                                              | 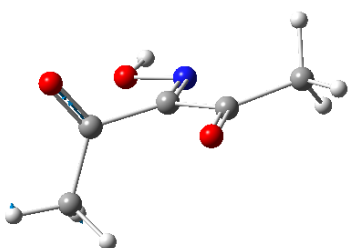<br>v(C=O)  |
| 1690<br>vs                                              | 1726<br><b>1671</b>                                                                                 | 1691<br>(175)                                                                                | <br>v(C=O) |
| 1365<br>s                                               | 1379<br><b>1334</b>                                                                                 | 1340<br>(160)                                                                                |            |

|            |                     |               |                                                                                                           |
|------------|---------------------|---------------|-----------------------------------------------------------------------------------------------------------|
| 3526<br>s  | 3794<br><b>3672</b> | 3615<br>(151) | 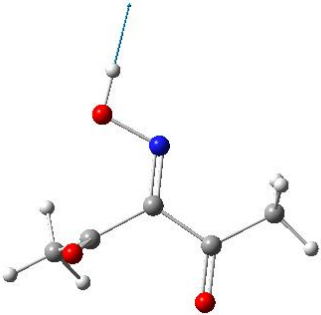 <p>v(O-H)</p>         |
| 966<br>m   | 453, 538            | 938<br>(58)   | <p>Combined band</p>    |
| 976<br>m   | 994<br><b>963</b>   | 961<br>(50)   |                        |
| 1700<br>sh | 538, 1215           | 1694<br>(50)  | <p>Combined band</p>  |
| 1355<br>sh | 1392<br><b>1347</b> | 1353<br>(26)  |                       |

<sup>a</sup> Lines are sorted according to predicted band intensity (given in parenthesis in column 3). Used abbreviations: vs – very strong, s – strong, sh – shoulder, m – medium, v - stretching

According to results presented in Tables S2-S3, the mean error in IR frequency prediction was less than  $15\text{ cm}^{-1}$ . Therefore, the same method was applied for prediction of IR spectra of PINO (Fig. S6, Table S4) and NHPI (Fig. S7, Table S5) in MeCN based on anharmonic vibrational analysis.

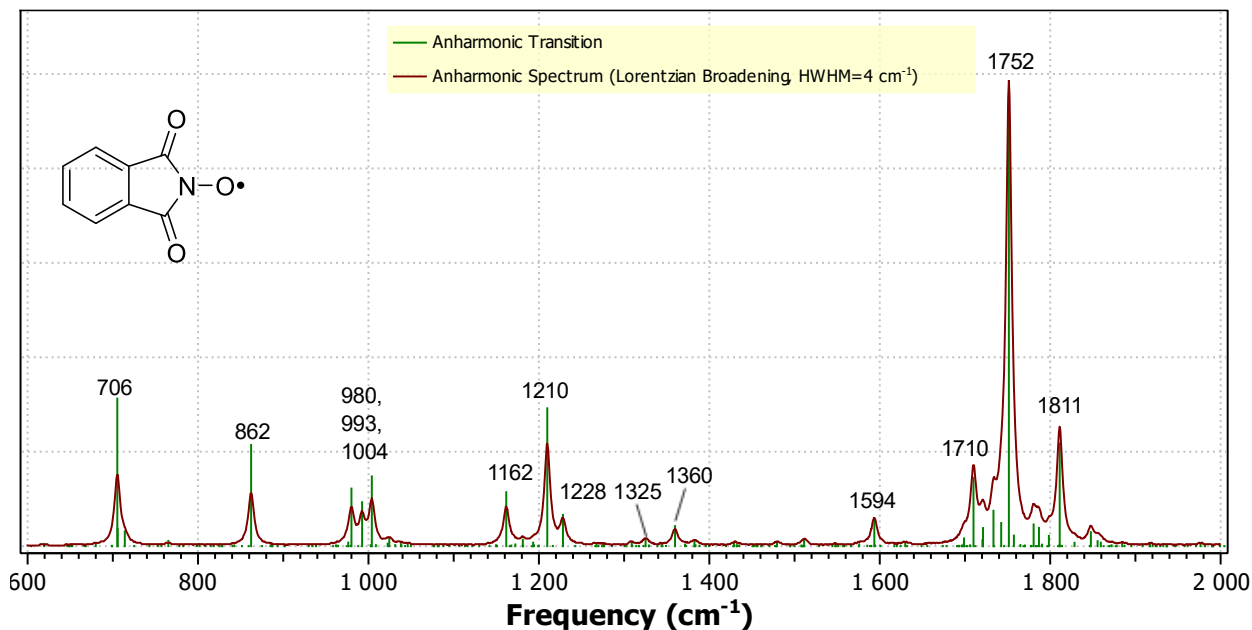

**Fig. S6.** Predicted PINO IR-spectrum

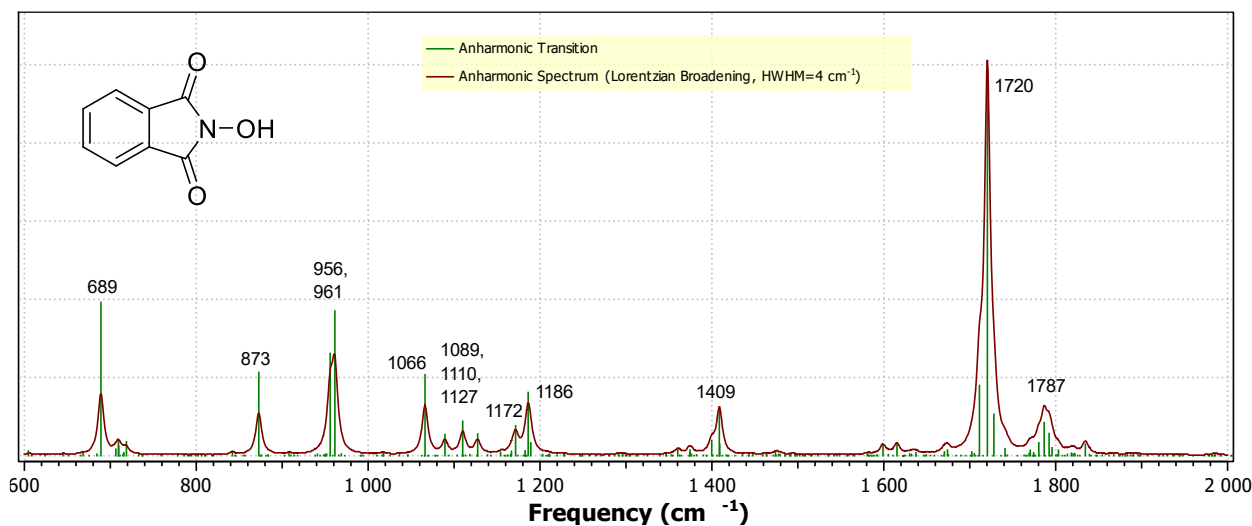

**Fig. S7.** Predicted NHPI IR-spectrum

**Table S4. Assignment of the most intensive IR bands in the FT-IR spectrum of PINO in MeCN.<sup>a</sup>**

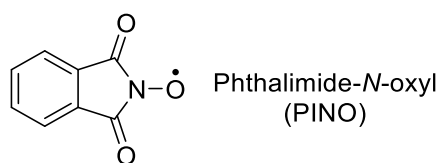

| Experimental IR freq., cm <sup>-1</sup> | Predicted harmonic IR freq., cm <sup>-1</sup><br>(scaled by factor 0.9679) <sup>9</sup> | Predicted anharmonic IR freq., cm <sup>-1</sup><br>(predicted intensity, km/mol) | Displacement vectors/Assignment                                                                       |
|-----------------------------------------|-----------------------------------------------------------------------------------------|----------------------------------------------------------------------------------|-------------------------------------------------------------------------------------------------------|
| 1749                                    | 1782<br><b>1724</b>                                                                     | 1752<br>(696)                                                                    | 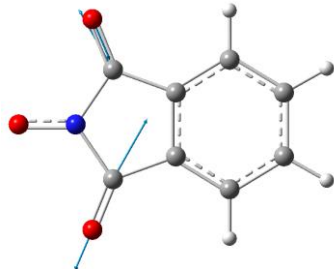                   |
| Overlap                                 | 1840<br><b>1781</b>                                                                     | 1811<br>(173)                                                                    |                   |
| 1214                                    | 1240<br><b>1200</b>                                                                     | 1210<br>(155)                                                                    |                   |
| 1718                                    | 722, 1047                                                                               | 1710<br>(108)                                                                    | Combined band<br> |

|         |                     |              |                                                                                                       |
|---------|---------------------|--------------|-------------------------------------------------------------------------------------------------------|
| Overlap | 708<br><b>685</b>   | 705<br>(97)  | 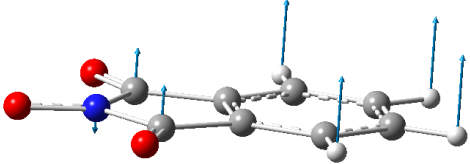                    |
| Overlap | 879<br><b>850.5</b> | 862<br>(81)  |                     |
| Overlap | 1047<br><b>1014</b> | 1004<br>(65) |                     |
| Overlap | 1184<br><b>1146</b> | 1162<br>(58) |                    |
| Overlap | 583, 1201           | 1733<br>(57) | Combined band<br> |
| 985     | 1009<br><b>976</b>  | 980<br>(55)  |                   |

|         |                     |              |                                                                                                        |
|---------|---------------------|--------------|--------------------------------------------------------------------------------------------------------|
|         | 1018<br><b>985</b>  | 993<br>(40)  | 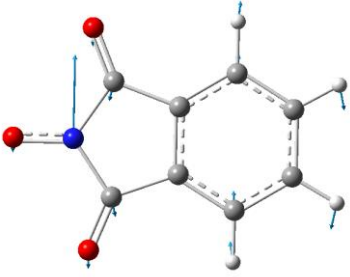                     |
| Overlap | 1633<br><b>1580</b> | 1594<br>(40) |                      |
| Overlap | 482, 1315           | 1742<br>(38) | Combined band<br>   |
| Overlap | 583, 1240           | 1780<br>(36) | Combined band<br> |
| 1233    | 519, 722            | 1228<br>(36) | Combined band                                                                                          |



|              |          |              |                      |
|--------------|----------|--------------|----------------------|
|              |          |              |                      |
| 1324<br>weak | 446, 754 | 1325<br>(10) | <p>Combined band</p> |

<sup>a</sup> Lines are sorted according to predicted band intensity (given in parenthesis in column 3).

**Table S5. Assignment of the most intensive IR bands in the FT-IR spectrum of NHPI in MeCN.<sup>a</sup>**

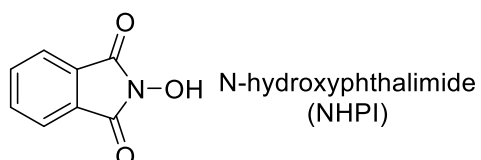

| Experimental IR freq., cm <sup>-1</sup> | Predicted harmonic IR freq., cm <sup>-1</sup><br>(scaled by factor 0.9679) <sup>9</sup> | Predicted anharmonic IR freq., cm <sup>-1</sup><br>(predicted intensity, km/mol) | Displacement vectors/Assignment |
|-----------------------------------------|-----------------------------------------------------------------------------------------|----------------------------------------------------------------------------------|---------------------------------|
|                                         |                                                                                         |                                                                                  |                                 |

|         |                |               |                                                                                                       |
|---------|----------------|---------------|-------------------------------------------------------------------------------------------------------|
| 1733vs  | 1751<br>(1695) | 1721<br>(694) | 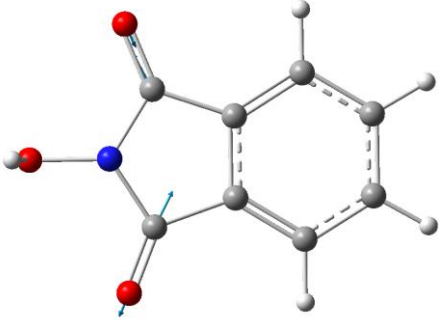                    |
| 970? m  | 979<br>(947)   | 961<br>(149)  |                     |
| Overlap | 610, 1136      | 1711<br>(128) | Combined band<br>  |
| 705 m   | 712<br>(689)   | 689<br>(113)  |                   |
| 970? m  | 282, 1459      | 956<br>(104)  | Combined band<br> |

|         |                |              |                                                                                                       |
|---------|----------------|--------------|-------------------------------------------------------------------------------------------------------|
|         | 3737<br>(3617) | 3501<br>(97) | 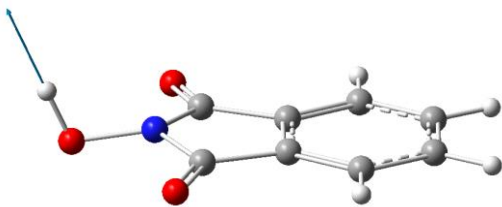                    |
| 1135? m | 1090<br>(1055) | 1066<br>(92) |                     |
| 1189? m | 1210<br>(1171) | 1186<br>(80) |                     |
| 881 m   | 887<br>(859)   | 873<br>(78)  |                    |
| Overlap | 718, 1038      | 1728<br>(76) | Combined band<br> |
| Overlap | 1459<br>(1412) | 1409<br>(69) |                   |

|         |                |              |                      |
|---------|----------------|--------------|----------------------|
| Overlap | 1819<br>(1760) | 1787<br>(63) |                      |
| Overlap | 610, 1210      | 1792<br>(42) | <p>Combined band</p> |
| 1135? m | 1136<br>(1100) | 1110<br>(41) |                      |
| 1189? m | 1179<br>(1141) | 1172<br>(37) |                      |

<sup>a</sup> Lines are sorted according to predicted band intensity (given in parenthesis in column 3). Used abbreviations: vs – very strong, s – strong, m – medium.

For “trimer” (bis(1,3-dioxoisindolin-2-yl) phthalate) anharmonic vibrational analysis was not performed due to its high computational cost. Predicted harmonic vibrations are given below in Table S6.

**Table S6. Assignment of the most intensive IR bands in the FT-IR spectrum of “trimer” in MeCN.<sup>a</sup>**

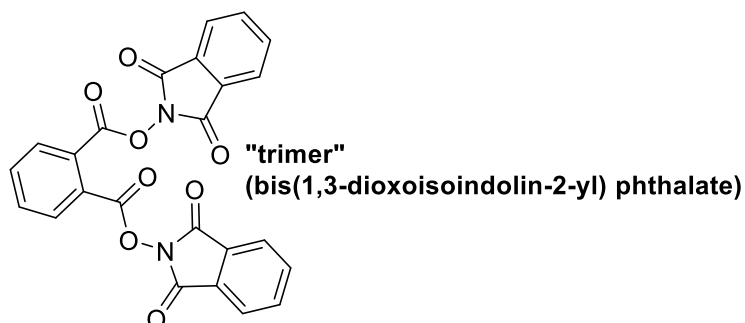

| Experimental IR freq., $\text{cm}^{-1}$ | Predicted harmonic IR freq., $\text{cm}^{-1}$ (scaled by factor 0.9679) <sup>9</sup> | Predicted intensity | Displacement vectors/Assignment |
|-----------------------------------------|--------------------------------------------------------------------------------------|---------------------|---------------------------------|
| 1749                                    | 1760<br><b>(1703)</b><br>$\nu(\text{C}=\text{O})$                                    | 2839                |                                 |

|           |                                                   |      |  |
|-----------|---------------------------------------------------|------|--|
| 1775-1785 | 1798<br><b>(1740)</b><br>$\nu(\text{C}=\text{O})$ | 1148 |  |
| 998       | 1044<br><b>(1011)</b>                             | 563  |  |

<sup>a</sup> Lines are sorted according to predicted band intensity (given in column 3).

Xyz coordinates of optimized structures on B3LYP-D3BJ/6-311++g(d,p)/CPCM(MeCN or CH<sub>2</sub>Cl<sub>2</sub>) level of theory are given below:

#### Diacetyliminoxyl radical (in CH<sub>2</sub>Cl<sub>2</sub>)

Charge = 0

Spin multiplicity = 2

Electronic Energy (EE) = -474.649575

EE + Thermal Enthalpy Correction = -474.532045

EE + Thermal Free Energy Correction = -474.578978

C -1.30203700 -1.99941500 -0.00002500

C -1.28295000 -0.49584800 -0.00000200

H -2.33858000 -2.33173100 -0.00008600

H -0.77366300 -2.38261100 -0.87456500  
H -0.77376200 -2.38262900 0.87456800  
C 0.04476400 0.22295500 0.00002000  
C 1.39961300 -0.39734000 0.00003500  
C 2.58701700 0.53466300 0.00002900  
H 2.56565200 1.18154000 -0.88039600  
H 3.49925900 -0.05877300 -0.00002900  
H 2.56571300 1.18145200 0.88052100  
N 0.00745800 1.52589700 0.00002500  
O -0.91045200 2.30772800 0.00001900  
O -2.30216800 0.16612900 -0.00007300  
O 1.52821200 -1.60868500 -0.00001200

### **Diacetyl oxime (in CH<sub>2</sub>Cl<sub>2</sub>)**

Charge = 0

Spin multiplicity = 1

Electronic Energy (EE) = -475.280150

EE + Thermal Enthalpy Correction = -475.150292

EE + Thermal Free Energy Correction = -475.198327

N 0.06882700 1.53835600 -0.02681200  
C 0.10392300 0.26262700 0.04138800  
C -1.12974000 -0.61916400 0.19692800  
C 1.43823700 -0.41314900 -0.02930400  
O -1.46058200 -0.97438300 1.30632000  
O 1.46219500 -1.63149500 -0.05240300  
O -1.22182300 2.03251200 0.02459900  
H -1.11334600 2.98986300 -0.04961000  
C -1.84225000 -0.98881500 -1.06702800  
H -2.72265100 -1.59107800 -0.84670100  
H -2.12638200 -0.07932800 -1.60415700  
H -1.15703900 -1.54603300 -1.71353400  
C 2.67557300 0.43796900 -0.07293600  
H 2.63175500 1.12963700 -0.91688500  
H 2.74333500 1.04358000 0.83418100  
H 3.54975300 -0.20502000 -0.15802300

**Phthalimide-N-oxyl radical (PINO) (in MeCN)**

Charge = 0

Spin multiplicity = 2

Electronic Energy (EE) = -587.828296

EE + Thermal Enthalpy Correction = -587.711851

EE + Thermal Free Energy Correction = -587.756420

O -3.01428600 0.00002400 0.00007700

N -1.75651700 -0.00001900 0.00043400

C -0.93378900 1.20257400 0.00053800

C -0.93376100 -1.20263500 -0.00065000

C 0.45112200 0.70222400 -0.00095000

O -1.38870200 2.31357900 0.00014900

C 0.45112900 -0.70219900 -0.00100300

O -1.38857900 -2.31365800 0.00039700

C 1.63586400 1.42219400 -0.00036500

C 1.63588400 -1.42214800 -0.00007100

C 2.83133700 0.69991800 0.00035100

H 1.63134200 2.50437000 -0.00030900

C 2.83134200 -0.69985200 0.00052800

H 1.63140100 -2.50432400 -0.00005600

H 3.77531200 1.23020200 0.00091800

H 3.77532000 -1.23013300 0.00115900

**N-hydroxyphthalimide (NHPI) (in MeCN)**

Charge = 0

Spin multiplicity = 1

Electronic Energy (EE) = -588.464868

EE + Thermal Enthalpy Correction = -588.335741

EE + Thermal Free Energy Correction = -588.380490

N -1.67038100 0.00000100 0.09598000

C -0.90517500 1.17825000 0.00936400

C -0.90517500 -1.17825100 0.00939600

C 0.50343600 0.69934600 0.00445400

O -1.35279400 2.29893200 -0.04343400



C 0.50343600 -0.69934700 0.00445500  
O -1.35279600 -2.29893100 -0.04343200  
C 1.68353400 1.42142200 0.00380600  
C 1.68353400 -1.42142300 0.00380000  
C 2.88251400 0.69838000 -0.00111300  
H 1.67931600 2.50391000 0.00511300  
C 2.88251400 -0.69838100 -0.00111600  
H 1.67931600 -2.50391000 0.00511100  
H 3.82593200 1.23004200 -0.00543400  
H 3.82593200 -1.23004200 -0.00543700  
O -3.02600200 -0.00000100 -0.11694900  
H -3.43680200 0.00000900 0.76103700

**“trimer”, bis(1,3-dioxoisindolin-2-yl) phthalate (in MeCN)**

Charge = 0

Spin multiplicity = 1

Electronic Energy (EE) = -1633.613672

EE + Thermal Enthalpy Correction = -1633.267850

EE + Thermal Free Energy Correction = -1633.356352

0 1

O -1.27403800 1.34017600 -0.21798800  
O -0.37347600 -3.62753300 1.56748500  
O -1.27410000 -1.34019600 0.21794900  
O -2.03671700 -1.92938800 -1.84311600  
O -0.37346000 3.62764400 -1.56735300  
O -2.03654200 1.92933300 1.84312900  
O 0.82456000 0.43779000 1.52160900  
O 0.82441900 -0.43796400 -1.52181100  
N -0.10774100 -2.00446600 -0.07365700  
N -0.10764400 2.00439200 0.07359400  
C 1.72848000 -3.28747100 0.34989600  
C 2.08995700 -2.31705000 -0.59085000  
C 0.31252600 -3.06968500 0.74715100  
C 1.72853900 3.28748000 -0.34986300  
C -2.19748100 -1.33638000 -0.81594200

C -3.40719500 -0.57462800 -0.40869900  
C 2.09005100 2.31697500 0.59078200  
C -2.19737700 1.33636300 0.81594500  
C -3.40714800 0.57469000 0.40872700  
C 0.92788200 1.42697600 0.83995500  
C 0.92776400 -1.42710200 -0.84009200  
C 0.31258400 3.06969800 -0.74711900  
C 3.36117800 2.27528300 1.13527100  
C 4.27777400 3.24228700 0.70578100  
C 3.91685000 4.21205900 -0.23260900  
C 2.62700800 4.24935800 -0.77588000  
H 3.63585800 1.52143500 1.86189400  
H 5.28394000 3.23821700 1.10611600  
H 4.64822100 4.94655600 -0.54607400  
H 2.34425200 4.99939900 -1.50331000  
C -4.62399800 1.12133700 0.82161100  
C -5.82988800 0.55850900 0.41509700  
C -5.82993500 -0.55829500 -0.41500300  
C -4.62409000 -1.12119900 -0.82154900  
H -4.61474200 2.00703200 1.44311200  
H -6.76416100 0.99859600 0.74007100  
H -6.76424400 -0.99832300 -0.73995200  
H -4.61490700 -2.00689600 -1.44304900  
C 3.36107400 -2.27538400 -1.13536300  
C 4.27769900 -3.24232500 -0.70579200  
C 3.91681100 -4.21201200 0.23269900  
C 2.62697900 -4.24928600 0.77599400  
H 3.63572600 -1.52160100 -1.86206400  
H 5.28385900 -3.23827100 -1.10614300  
H 4.64820300 -4.94646200 0.54622600  
H 2.34425100 -4.99926200 1.50350200

**6. The summary: assignment of the absorption bands in the region 1100–1350 cm<sup>-1</sup>**

**Table S7. The assignment of the absorption bands in Fig.5.**

| $\nu$ , cm <sup>-1</sup> | Assignment                                                    | Compound                                             |
|--------------------------|---------------------------------------------------------------|------------------------------------------------------|
| 1135                     | $\delta$ -ring (in cyclic imide ring)                         | NHPI                                                 |
| 1189                     | $\delta$ (C–H), $\nu$ (C–C)                                   | NHPI, “trimer”                                       |
| 1214                     | Asymmetric breathing mode of imide and benzene rings in plane | PINO                                                 |
| 1219                     | $\nu$ (C–O)                                                   | AcOH (in acetonitrile)                               |
| 1233                     | Combined band                                                 | PINO                                                 |
| 1245                     | $\nu$ (C–O)                                                   | “trimer”                                             |
| 1259                     | $\nu$ (C–O)                                                   | NHPI, Phthalic anhydride                             |
| 1305                     | $\nu$ (N–O)                                                   | HNO <sub>3</sub> , NO <sub>2</sub> (in acetonitrile) |
| 1324                     | $\nu$ (N–O)• <sup>a</sup>                                     | PINO                                                 |

<sup>a</sup> Combined band according to DFT

## References

- (1) Krishnakumar, V.; Sivasubramanian, M.; Muthunatesan, S. Density Functional Theory Study and Vibrational Analysis of FT-IR and FT-Raman Spectra of N-hydroxyphthalimide. *J Raman Spectroscopy* **2009**, *40* (8), 987–991. <https://doi.org/10.1002/jrs.2214>.
- (2) Krishnakumar, V.; Manohar, S.; Nagalakshmi, R. Crystal Growth and Characterization of N-Hydroxyphthalimide (C<sub>8</sub>H<sub>5</sub>NO<sub>3</sub>) Crystal. *Spectrochimica Acta Part A: Molecular and Biomolecular Spectroscopy* **2008**, *71* (1), 110–115. <https://doi.org/10.1016/j.saa.2007.11.023>.
- (3) Matsuo, T. Carbonyl Absorption Bands in the Infrared Spectra of Some Cyclic Imides with a Five-Membered Ring. *BCSJ* **1964**, *37* (12), 1844–1848. <https://doi.org/10.1246/bcsj.37.1844>.
- (4) Frisch, M. J.; Trucks, G. W.; Schlegel, H. B.; Scuseria, G. E.; Robb, M. A.; Cheeseman, J. R.; Scalmani, G.; Barone, V.; Petersson, G. A.; Nakatsuji, H.; Li, X.; Caricato, M.; Marenich, A. V.; Bloino, J.; Janesko, B. G.; Gomperts, R.; Mennucci, B.; Hratchian, H. P.; Ortiz, J. V.; Izmaylov, A. F.; Sonnenberg, J. L.; Williams; Ding, F.; Lipparini, F.; Egidi, F.; Goings, J.; Peng, B.; Petrone, A.; Henderson, T.; Ranasinghe, D.; Zakrzewski, V. G.; Gao, J.; Rega, N.; Zheng, G.; Liang, W.; Hada, M.; Ehara, M.; Toyota, K.; Fukuda, R.; Hasegawa, J.; Ishida, M.; Nakajima, T.; Honda, Y.; Kitao, O.; Nakai, H.; Vreven, T.; Throssell, K.; Montgomery Jr., J. A.; Peralta, J. E.; Ogliaro, F.; Bearpark, M. J.; Heyd, J. J.; Brothers, E. N.; Kudin, K. N.; Staroverov, V. N.; Keith, T. A.; Kobayashi, R.; Normand, J.; Raghavachari, K.; Rendell, A. P.; Burant, J. C.; Iyengar, S. S.; Tomasi, J.; Cossi, M.; Millam, J. M.; Klene, M.; Adamo, C.; Cammi, R.; Ochterski, J. W.; Martin, R. L.; Morokuma, K.; Farkas, O.; Foresman, J. B.; Fox, D. J. Gaussian 16 Rev. A.03, Wallingford, CT, 2016.
- (5) Becke, A. D. Density-Functional Thermochemistry. III. The Role of Exact Exchange. *The Journal of Chemical Physics* **1993**, *98* (7), 5648–5652. <https://doi.org/10.1063/1.464913>.
- (6) Barone, V.; Cossi, M. Quantum Calculation of Molecular Energies and Energy Gradients in Solution by a Conductor Solvent Model. *J. Phys. Chem. A* **1998**, *102* (11), 1995–2001. <https://doi.org/10.1021/jp9716997>.
- (7) Cossi, M.; Rega, N.; Scalmani, G.; Barone, V. Energies, Structures, and Electronic Properties of Molecules in Solution with the C-PCM Solvation Model. *J Comput Chem* **2003**, *24* (6), 669–681. <https://doi.org/10.1002/jcc.10189>.
- (8) Krylov, I. B.; Paveliev, S. A.; Shelimov, B. N.; Lokshin, B. V.; Garbuzova, I. A.; Tafeenko, V. A.; Chernyshev, V. V.; Budnikov, A. S.; Nikishin, G. I.; Terent'ev, A. O. Selective Cross-Dehydrogenative C–O Coupling of N-Hydroxy Compounds with Pyrazolones. Introduction of the Diacetyliminoxyl Radical into the Practice of Organic Synthesis. *Org. Chem. Front.* **2017**, *4* (10), 1947–1957. <https://doi.org/10.1039/C7QO00447H>.
- (9) Andersson, M. P.; Uvdal, P. New Scale Factors for Harmonic Vibrational Frequencies Using the B3LYP Density Functional Method with the Triple- $\zeta$  Basis Set 6-311+G(d,p). *J. Phys. Chem. A* **2005**, *109* (12), 2937–2941. <https://doi.org/10.1021/jp045733a>.
